# Supplementary material
Source: PubMed Central journal article supplement (PMC11376872)

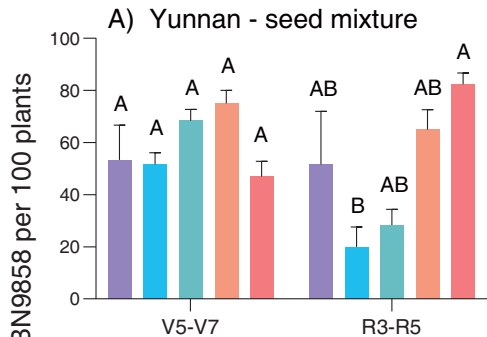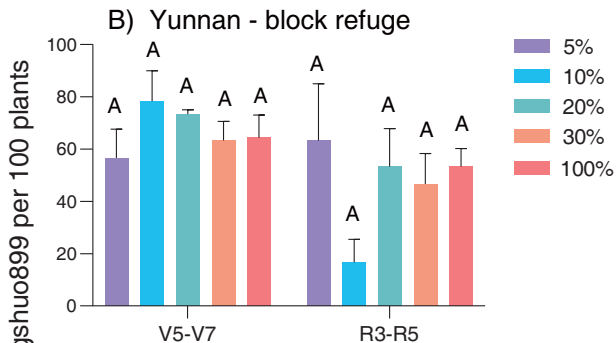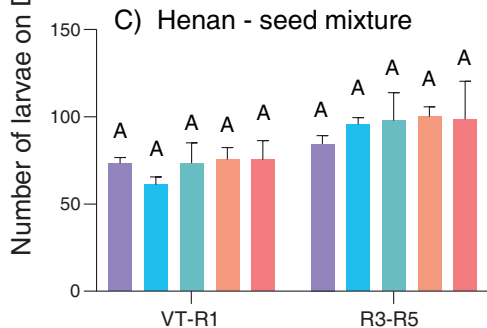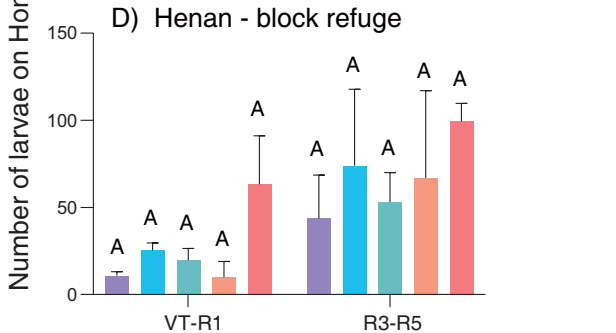

Supplement: PBI-21-391-s001.pdf [file PBI-21-391-s001.pdf]
